# Supplementary material
Source: PubMed Central journal article supplement (PMC8208166)
Supplement: AEM.03075-20_aem.03075-20-s0001.pdf [file AEM.03075-20_aem.03075-20-s0001.pdf]

**Microbial ecological mechanism for long-term production of high concentrations of *n*-caproate via lactate-driven chain elongation**

Xiaoyu Zhu <sup>a, b\*</sup>, Xin Feng <sup>a, b</sup>, Cheng Liang <sup>a, b</sup>, Jiabao Li <sup>a, b</sup>, Jia Jia <sup>a, b</sup>, Leiyu Feng <sup>c</sup>, Yong Tao <sup>a, b</sup>,  
Yinguang Chen <sup>c</sup>

<sup>a</sup>: Key Laboratory of Environmental and Applied Microbiology, Chinese Academy of Sciences;  
Environmental Microbiology Key Laboratory of Sichuan Province, Chengdu Institute of  
Biology, Chinese Academy of Sciences, Chengdu, 610041, PR China

<sup>b</sup>: University of Chinese Academy of Sciences, Beijing, 100864, PR China

<sup>c</sup>: State Key Laboratory of Pollution Control and Resources Reuse, School of Environmental  
Science and Engineering, Tongji University, Shanghai, 200082, PR China

\* Corresponding author: Xiaoyu Zhu

Xiaoyu Zhu and Xin Feng contributed equally to this paper. Author order was determined by  
drawing straws.

Tel.: +86-028-82890209

Fax: + 86-028-82890211

**Supplementary Material: 12 tables, 5 figures**

**TABLE S1.** The microbial structural biodiversity

| Days | Chao1   | Observed OTUs | Shannon | Good Coverage (%) | Num. seqs. |
|------|---------|---------------|---------|-------------------|------------|
| 0    | 223.538 | 146           | 4.432   | 99.73             | 25975      |
| 20   | 314.333 | 141           | 4.778   | 99.53             | 17030      |
| 40   | 210.588 | 120           | 4.082   | 99.69             | 9855       |
| 60   | 190.125 | 104           | 3.721   | 99.73             | 40068      |
| 80   | 326.167 | 155           | 4.713   | 99.68             | -          |
| 100  | 314.870 | 174           | 5.063   | 99.69             | -          |
| 120  | 332.250 | 186           | 5.191   | 99.65             | -          |
| 140  | 283.241 | 177           | 5.205   | 99.73             | -          |
| 160  | 387.222 | 185           | 4.581   | 99.61             | -          |
| 180  | 421.118 | 164           | 5.064   | 99.53             | -          |
| 202  | 256.875 | 177           | 4.621   | 99.52             | 60704      |
| 224  | 259.885 | 156           | 5.241   | 99.25             | 39664      |
| 246  | 241.316 | 145           | 4.879   | 99.40             | 68780      |
| 268  | 347.050 | 193           | 5.699   | 99.37             | 35065      |
| 290  | 266.621 | 176           | 5.010   | 99.25             | 27611      |
| 312  | 331.500 | 174           | 4.558   | 99.52             | 41395      |
| 334  | 382.091 | 226           | 5.983   | 99.16             | 28821      |
| 356  | 385.897 | 194           | 4.859   | 99.20             | 12751      |
| 378  | 342.097 | 210           | 5.358   | 99.13             | 31305      |
| 400  | 374.667 | 223           | 5.658   | 99.16             | 23409      |
| 425  | 399.276 | 211           | 4.902   | 98.87             | 18439      |
| 450  | 333.615 | 183           | 4.922   | 99.18             | 14159      |
| 475  | 357.677 | 198           | 4.786   | 99.34             | 15934      |
| 500  | 277.652 | 157           | 4.602   | 99.30             | 11974      |
| 525  | 345.750 | 163           | 4.230   | 99.03             | 19411      |
| 550  | 371.042 | 185           | 4.905   | 99.38             | 16300      |
| 575  | 365.156 | 201           | 5.069   | 99.53             | 53320      |
| 600  | 370.000 | 188           | 4.370   | 99.42             | 17730      |
| 625  | 205.000 | 142           | 3.759   | 99.42             | 16129      |
| 650  | 345.200 | 190           | 4.477   | 99.66             | 57283      |
| 661  | 269.526 | 135           | 4.176   | 99.73             | 42929      |
| 672  | 358.444 | 186           | 4.634   | 99.45             | 18019      |
| 683  | 434.550 | 216           | 5.895   | 99.69             | 47338      |
| 694  | 578.526 | 209           | 5.089   | 99.60             | 42698      |
| 705  | 300.476 | 150           | 3.752   | 99.34             | 19419      |
| 716  | 753.927 | 316           | 5.420   | 99.57             | 132524     |
| 727  | 694.560 | 324           | 5.467   | 98.04             | 28707      |
| 740  | 832.022 | 349           | 5.675   | 98.02             | 277976     |
| 752  | 702.889 | 349           | 5.700   | 97.42             | 188058     |

**TABLE S2** Relative abundance at family and genus levels of microbial community of real wastewater

| Organisms                   | Relative abundance (%) |
|-----------------------------|------------------------|
| Lactobacillaceae            | 99.8                   |
| <i>Lactobacillus</i>        |                        |
| Methanobacteriaceae         | 0.004                  |
| <i>Methanobacterium</i>     |                        |
| Lactobacillales;Other       | 0.004                  |
| Lactobacillales;Other;Other |                        |
| Geobacteraceae              | 0.004                  |
| <i>Geobacter</i>            |                        |
| Others                      | 0.008                  |

**TABLE S3** Reactor performances comparison during different phases

|                                         | HRT <sup>a</sup> | Acetate | <i>n</i> -Butyrate | <i>n</i> -Caproate | Propionate    | <i>n</i> -Valerate |              |
|-----------------------------------------|------------------|---------|--------------------|--------------------|---------------|--------------------|--------------|
| <b>Concentration (g L<sup>-1</sup>)</b> | <b>15</b>        | Phase 1 | 1.97 ± 1.04        | 1.98 ± 1.94        | 23.87 ± 2.74  | 0.78 ± 0.82        | 1.26 ± 1.50  |
|                                         |                  | Phase 2 | 3.94 ± 2.25        | 2.87 ± 2.23        | 19.35 ± 3.24  | 3.28 ± 1.83        | 6.59 ± 1.66  |
|                                         | <b>8</b>         | Phase 3 | 1.65 ± 0.89        | 2.85 ± 1.25        | 16.08 ± 2.53  | 1.03 ± 0.89        | 5.05 ± 1.38  |
|                                         |                  | Phase 4 | 2.16 ± 1.48        | 3.33 ± 1.22        | 27.01 ± 4.18  | 0.81 ± 0.92        | 4.65 ± 1.95  |
| <b>Specificity (mM C %)</b>             | <b>15</b>        | Phase 1 | 4.43 ± 2.34        | 6.06 ± 5.94        | 83.23 ± 9.55  | 2.14 ± 2.24        | 4.16 ± 4.95  |
|                                         |                  | Phase 2 | 7.65 ± 4.37        | 7.58 ± 5.89        | 58.24 ± 9.75  | 7.74 ± 4.32        | 18.79 ± 4.73 |
|                                         | <b>8</b>         | Phase 3 | 4.21 ± 2.27        | 9.92 ± 4.35        | 63.71 ± 10.02 | 3.21 ± 2.77        | 18.95 ± 5.18 |
|                                         |                  | Phase 4 | 3.84 ± 2.63        | 8.06 ± 2.95        | 74.24 ± 11.49 | 1.74 ± 1.98        | 12.12 ± 5.08 |

<sup>a</sup>: HRT is the abbreviation of hydraulic retention time

**TABLE S4** Biogas content during the long-term operation period

| <b>Biogas</b>   | <b>Content (%)</b> |                |                |                |
|-----------------|--------------------|----------------|----------------|----------------|
|                 | <b>Phase 1</b>     | <b>Phase 2</b> | <b>Phase 3</b> | <b>Phase 4</b> |
| H <sub>2</sub>  | 12.6 ± 3.09        | 9.67 ± 3.46    | 13.2 ± 1.63    | 18.3 ± 1.16    |
| N <sub>2</sub>  | 11.4 ± 2.02        | 11.6 ± 2.04    | 11.3 ± 1.62    | 8.07 ± 1.91    |
| CO <sub>2</sub> | 62.9 ± 4.60        | 60.6 ± 5.80    | 64.5 ± 2.10    | 66.9 ± 2.86    |
| CH <sub>4</sub> | 12.7 ± 5.53        | 16.9 ± 7.10    | 10.7 ± 1.55    | 7.00 ± 1.21    |

**TABLE S5** Significant difference of microbiomes in reactor during different phases

| Genus                                  | Phase 1                        | Phase 2                        | Phase 3                        | Phase 4                        | p-Value |
|----------------------------------------|--------------------------------|--------------------------------|--------------------------------|--------------------------------|---------|
|                                        | Average relative abundance (%) |         |
| <i>Caproiciproducens</i>               | 47.77 <sup>ab</sup>            | 39.74 <sup>a</sup>             | 56.98 <sup>ab</sup>            | 64.47 <sup>b</sup>             | 0.010   |
| <i>Lactobacillus</i>                   | 8.84 <sup>ab</sup>             | 14.34 <sup>a</sup>             | 14.74 <sup>a</sup>             | 3.81 <sup>b</sup>              | 0.013   |
| <i>Methanobacterium</i>                | 15.92                          | 11.01                          | 2.68                           | 4.47                           | 0.045   |
| <i>Lachnospiraceae uncultured</i>      | 5.49 <sup>a</sup>              | 0.95 <sup>b</sup>              | 0.98 <sup>b</sup>              | 3.77 <sup>ab</sup>             | 0.003   |
| <i>Clostridium sensu stricto 12</i>    | 3.60                           | 3.25                           | 1.75                           | 1.41                           | 0.676   |
| <i>Enterococcus</i>                    | 0.31 <sup>a</sup>              | 4.60 <sup>b</sup>              | 3.39 <sup>ab</sup>             | 1.60 <sup>ab</sup>             | 0.019   |
| <i>Cutibacterium</i>                   | 0.35 <sup>a</sup>              | 6.08 <sup>b</sup>              | 1.11 <sup>a</sup>              | 0.48 <sup>a</sup>              | 0.002   |
| <i>Garciella</i>                       | 0.31                           | 6.30                           | 0.05                           | 0.69                           | 0.360   |
| <i>Clostridiaceae 1 Other</i>          | 2.31                           | 0.19                           | 4.16                           | 1.27                           | 0.217   |
| <i>Pseudomonas</i>                     | 5.09                           | 0.30                           | 0.02                           | 0.07                           | 0.444   |
| <i>Clostridiaceae 1 uncultured</i>     | 3.30 <sup>a</sup>              | 0.00 <sup>b</sup>              | 0.00 <sup>b</sup>              | 0.53 <sup>b</sup>              | 0.000   |
| <i>Gordonibacter</i>                   | 0.00 <sup>a</sup>              | 0.82 <sup>ab</sup>             | 3.51 <sup>b</sup>              | 0.68 <sup>ab</sup>             | 0.026   |
| <i>Sporanaerobacter</i>                | 0.04 <sup>a</sup>              | 0.63 <sup>a</sup>              | 0.23 <sup>a</sup>              | 3.60 <sup>b</sup>              | 0.003   |
| <i>Corynebacterium 1</i>               | 0.00                           | 1.73                           | 1.61                           | 0.35                           | 0.088   |
| <i>Caldicoprobacter</i>                | 1.69 <sup>a</sup>              | 0.10 <sup>b</sup>              | 0.11 <sup>b</sup>              | 0.88 <sup>ab</sup>             | 0.000   |
| <i>Anaerocolumna</i>                   | 0.24                           | 0.40                           | 0.71                           | 0.27                           | 0.111   |
| <i>Anaerosporobacter</i>               | 0.20                           | 0.72                           | 0.60                           | 0.17                           | 0.473   |
| <i>Rummeliibacillus</i>                | 0.05                           | 0.36                           | 0.35                           | 0.44                           | 0.165   |
| <i>Family XI uncultured</i>            | 0.32                           | 0.28                           | 0.28                           | 0.38                           | 0.970   |
| <i>Kurthia</i>                         | 0.00 <sup>a</sup>              | 0.16 <sup>ab</sup>             | 0.08 <sup>a</sup>              | 0.91 <sup>b</sup>              | 0.011   |
| <i>Tyzzerella</i>                      | 0.00                           | 0.64                           | 0.21                           | 0.08                           | 0.078   |
| <i>Georgenia</i>                       | 0.32                           | 0.05                           | 0.44                           | 0.31                           | 0.133   |
| <i>Arcanobacterium</i>                 | 0.32                           | 0.16                           | 0.27                           | 0.31                           | 0.522   |
| <i>Oscillibacter</i>                   | 0.01                           | 0.41                           | 0.23                           | 0.40                           | 0.142   |
| <i>Olsenella</i>                       | 0.05                           | 0.35                           | 0.45                           | 0.11                           | 0.144   |
| <i>Clostridium sensu stricto 13</i>    | 0.23                           | 0.14                           | 0.46                           | 0.05                           | 0.158   |
| <i>Clostridium sensu stricto 15</i>    | 0.34                           | 0.43                           | 0.06                           | 0.04                           | 0.324   |
| <i>Family XI Sedimentibacter</i>       | 0.00 <sup>a</sup>              | 0.71 <sup>b</sup>              | 0.08 <sup>a</sup>              | 0.01 <sup>a</sup>              | 0.004   |
| <i>Bacillaceae Bacillus</i>            | 0.21                           | 0.13                           | 0.15                           | 0.30                           | 0.646   |
| <i>Ruminiclostridium 5</i>             | 0.02 <sup>a</sup>              | 0.04 <sup>a</sup>              | 0.06 <sup>a</sup>              | 0.75 <sup>b</sup>              | 0.000   |
| <i>[Eubacterium] fissicatena group</i> | 0.20                           | 0.26                           | 0.13                           | 0.13                           | 0.311   |
| <i>Ruminococcaceae uncultured</i>      | 0.01 <sup>a</sup>              | 0.06 <sup>a</sup>              | 0.06 <sup>a</sup>              | 0.57 <sup>b</sup>              | 0.000   |
| <i>Proteiniphilum</i>                  | 0.00                           | 0.53                           | 0.08                           | 0.01                           | 0.232   |
| <i>[Eubacterium] nodatum group</i>     | 0.40                           | 0.01                           | 0.08                           | 0.11                           | 0.053   |

|                                |                   |                   |                    |                    |       |
|--------------------------------|-------------------|-------------------|--------------------|--------------------|-------|
| <i>Ruminococcaceae Other</i>   | 0.05 <sup>a</sup> | 0.04 <sup>a</sup> | 0.13 <sup>a</sup>  | 0.38 <sup>b</sup>  | 0.000 |
| <i>Tissierella</i>             | 0.13              | 0.17              | 0.10               | 0.15               | 0.887 |
| <i>Haloimpatiens</i>           | 0.11              | 0.19              | 0.09               | 0.11               | 0.813 |
| <i>Family XIII S5-A14a</i>     | 0.37              | 0.08              | 0.21               | 0.01               | 0.326 |
| <i>Lachnospiraceae Other</i>   | 0.09              | 0.14              | 0.09               | 0.16               | 0.399 |
| <i>Lachnospiraceae Blautia</i> | 0.04              | 0.12              | 0.22               | 0.09               | 0.361 |
| <i>Anaerotruncus</i>           | 0.02 <sup>a</sup> | 0.26 <sup>b</sup> | 0.07 <sup>ab</sup> | 0.07 <sup>ab</sup> | 0.040 |

---

Different superscripts are shown for values that differ significantly from each other ( $P < 0.05$ , Tukey test).

**TABLE S6** Taxonomic compositions of microbiomes in reactor

| Genus                                              | Phase 1                                 | Phase 2                                 | Adjusted<br><i>p</i> -Value <sup>a</sup> | Phase 3                                 | Phase 4                                 | Adjusted<br><i>p</i> -Value <sup>b</sup> |
|----------------------------------------------------|-----------------------------------------|-----------------------------------------|------------------------------------------|-----------------------------------------|-----------------------------------------|------------------------------------------|
|                                                    | Average<br>relative<br>abundance<br>(%) | Average<br>relative<br>abundance<br>(%) |                                          | Average<br>relative<br>abundance<br>(%) | Average<br>relative<br>abundance<br>(%) |                                          |
| <i>Caproiciproducens</i>                           | 47.77 ± 15.61                           | 39.74 ± 16.62                           | 0.2106                                   | 56.98 ± 8.74                            | 64.47 ± 19.6                            | 0.3237                                   |
| <i>Lactobacillus</i>                               | 8.84 ± 4.55                             | 14.34 ± 8.81                            | 0.0883                                   | 14.74 ± 8.82                            | 3.81 ± 2.59                             | 0.0079                                   |
| <i>Methanobacterium</i>                            | 15.92 ± 11.28                           | 11.01 ± 14.98                           | 0.5092                                   | 2.68 ± 3.90                             | 4.47 ± 3.85                             | 0.3700                                   |
| <i>Lachnospiraceae</i><br><i>uncultured</i>        | 5.49 ± 4.71                             | 0.95 ± 0.60                             | 0.0366                                   | 0.98 ± 0.74                             | 3.77 ± 2.89                             | 0.0266                                   |
| <i>Clostridium sensu</i><br><i>stricto 12</i>      | 3.60 ± 7.40                             | 3.25 ± 4.41                             | 0.9044                                   | 1.75 ± 1.49                             | 1.41 ± 2.06                             | 0.7109                                   |
| <i>Enterococcus</i>                                | 0.31 ± 0.41                             | 4.60 ± 4.38                             | 0.0166                                   | 3.39 ± 3.35                             | 1.60 ± 1.46                             | 0.1926                                   |
| <i>Cutibacterium</i>                               | 0.35 ± 0.42                             | 6.08 ± 6.08                             | 0.0219                                   | 1.11 ± 1.81                             | 0.48 ± 1.36                             | 0.4438                                   |
| <i>Garciella</i>                                   | 0.31 ± 0.60                             | 6.30 ± 16.62                            | 0.2972                                   | 0.05 ± 0.05                             | 0.69 ± 1.05                             | 0.1195                                   |
| <i>Clostridiaceae 1</i><br><i>Other</i>            | 2.31 ± 3.33                             | 0.19 ± 0.23                             | 0.1305                                   | 4.16 ± 6.21                             | 1.27 ± 2.32                             | 0.2447                                   |
| <i>Pseudomonas</i>                                 | 5.09 ± 15.28                            | 0.30 ± 0.60                             | 0.1748                                   | 0.02 ± 0.03                             | 0.07 ± 0.19                             | 0.4407                                   |
| <i>Clostridiaceae 1</i><br><i>uncultured</i>       | 3.30 ± 2.89                             | 0.00 ± 0.00                             | 0.0079                                   | 0.00 ± 0.00                             | 0.53 ± 0.45                             | 0.0111                                   |
| <i>Gordonibacter</i>                               | 0.00 ± 0.00                             | 0.82 ± 0.12                             | 0.0719                                   | 3.51 ± 4.14                             | 0.68 ± 1.10                             | 0.0934                                   |
| <i>Sporanaerobacter</i>                            | 0.04 ± 0.07                             | 0.63 ± 1.39                             | 0.2284                                   | 0.23 ± 0.30                             | 3.60 ± 3.94                             | 0.0418                                   |
| <i>Corynebacterium 1</i>                           | 0.00 ± 0.04                             | 1.73 ± 1.56                             | 0.0097                                   | 1.61 ± 3.20                             | 0.35 ± 0.35                             | 0.2999                                   |
| <i>Caldicoprobacter</i>                            | 1.69 ± 1.37                             | 0.10 ± 0.17                             | 0.0146                                   | 0.11 ± 0.11                             | 0.88 ± 0.86                             | 0.0356                                   |
| <i>Anaerocolumna</i>                               | 0.24 ± 0.25                             | 0.40 ± 0.45                             | 0.3706                                   | 0.71 ± 0.89                             | 0.27 ± 0.18                             | 0.2048                                   |
| <i>Anaerosporobacter</i>                           | 0.20 ± 0.24                             | 0.72 ± 1.53                             | 0.2900                                   | 0.60 ± 0.81                             | 0.17 ± 0.18                             | 0.1720                                   |
| <i>Rummeliibacillus</i>                            | 0.05 ± 0.07                             | 0.36 ± 0.51                             | 0.0997                                   | 0.35 ± 0.19                             | 0.44 ± 0.52                             | 0.6415                                   |
| <i>Family XI</i><br><i>uncultured</i>              | 0.32 ± 0.31                             | 0.28 ± 0.70                             | 0.8759                                   | 0.28 ± 0.40                             | 0.38 ± 0.55                             | 0.6768                                   |
| <i>Kurthia</i>                                     | 0.00 ± 0.00                             | 0.16 ± 0.31                             | 0.1551                                   | 0.08 ± 0.17                             | 0.91 ± 1.15                             | 0.0780                                   |
| <i>Tyzzarella</i>                                  | 0.00 ± 0.00                             | 0.64 ± 0.88                             | 0.0575                                   | 0.21 ± 0.52                             | 0.08 ± 0.07                             | 0.5165                                   |
| <i>Georgenia</i>                                   | 0.32 ± 0.39                             | 0.05 ± 0.06                             | 0.1359                                   | 0.44 ± 0.47                             | 0.31 ± 0.27                             | 0.5073                                   |
| <i>Arcanobacterium</i>                             | 0.32 ± 0.34                             | 0.16 ± 0.13                             | 0.2206                                   | 0.27 ± 0.36                             | 0.31 ± 0.12                             | 0.7561                                   |
| <i>Oscillibacter</i>                               | 0.01 ± 0.02                             | 0.41 ± 0.61                             | 0.0805                                   | 0.23 ± 0.43                             | 0.40 ± 0.33                             | 0.3850                                   |
| <i>Olsenella</i>                                   | 0.05 ± 0.10                             | 0.35 ± 0.39                             | 0.0525                                   | 0.45 ± 0.61                             | 0.11 ± 0.13                             | 0.1639                                   |
| <i>Clostridium sensu</i><br><i>stricto 13</i>      | 0.23 ± 0.25                             | 0.14 ± 0.12                             | 0.2330                                   | 0.46 ± 0.64                             | 0.05 ± 0.11                             | 0.1113                                   |
| <i>Clostridium sensu</i><br><i>stricto 15</i>      | 0.34 ± 0.54                             | 0.43 ± 0.86                             | 0.7251                                   | 0.06 ± 0.07                             | 0.04 ± 0.06                             | 0.5702                                   |
| <i>Family XI</i><br><i>Sedimentibacter</i>         | 0.00 ± 0.00                             | 0.71 ± 0.84                             | 0.0319                                   | 0.08 ± 0.10                             | 0.01 ± 0.03                             | 0.0919                                   |
| <i>Bacillaceae Bacillus</i>                        | 0.21 ± 0.36                             | 0.13 ± 0.16                             | 0.5112                                   | 0.15 ± 0.11                             | 0.30 ± 0.35                             | 0.3003                                   |
| <i>Ruminiclostridium 5</i><br><i>[Eubacterium]</i> | 0.02 ± 0.03                             | 0.04 ± 0.07                             | 0.3446                                   | 0.06 ± 0.07                             | 0.75 ± 0.69                             | 0.0220                                   |
| <i>fissicatena group</i>                           | 0.20 ± 0.15                             | 0.26 ± 0.16                             | 0.3374                                   | 0.13 ± 0.18                             | 0.13 ± 0.14                             | 0.9894                                   |
| <i>Ruminococcaceae</i><br><i>uncultured</i>        | 0.01 ± 0.02                             | 0.06 ± 0.07                             | 0.0576                                   | 0.06 ± 0.06                             | 0.57 ± 0.45                             | 0.0133                                   |

|                                              |             |             |        |             |              |        |
|----------------------------------------------|-------------|-------------|--------|-------------|--------------|--------|
| <i>Proteiniphilum</i>                        | 0.00 ± 0.00 | 0.53 ± 1.21 | 0.2200 | 0.08 ± 0.14 | 0.01 ± 0.03  | 0.2122 |
| <i>[Eubacterium]</i><br><i>nodatum</i> group | 0.40 ± 0.58 | 0.01 ± 0.03 | 0.0668 | 0.08 ± 0.13 | 0.11 ± 0.08  | 0.5344 |
| <i>Ruminococcaceae</i><br><i>Other</i>       | 0.05 ± 0.05 | 0.04 ± 0.05 | 0.8793 | 0.13 ± 0.14 | 0.38% ± 0.23 | 0.0187 |
| <i>Tissierella</i>                           | 0.13 ± 0.10 | 0.17 ± 0.20 | 0.3583 | 0.10 ± 0.13 | 0.15 ± 0.28  | 0.6357 |
| <i>Haloimpatiens</i>                         | 0.11 ± 0.31 | 0.19 ± 0.19 | 0.5771 | 0.09 ± 0.09 | 0.11 ± 0.32  | 0.8541 |
| <i>Family XIII S5-A14a</i>                   | 0.37 ± 0.71 | 0.08 ± 0.13 | 0.5726 | 0.21 ± 0.43 | 0.01 ± 0.02  | 0.2272 |
| <i>Lachnospiraceae</i><br><i>Other</i>       | 0.09 ± 0.09 | 0.14 ± 0.14 | 0.3875 | 0.09 ± 0.08 | 0.16 ± 0.11  | 0.1849 |
| <i>Lachnospiraceae</i><br><i>Blautia</i>     | 0.04 ± 0.06 | 0.12 ± 0.24 | 0.3376 | 0.22 ± 0.26 | 0.09 ± 0.13  | 0.2159 |
| <i>Anaerotruncus</i>                         | 0.02 ± 0.06 | 0.26 ± 0.32 | 0.0516 | 0.07 ± 0.14 | 0.07 ± 0.07  | 0.9432 |

<sup>a</sup>: significant difference between phase 1 and phase 2

<sup>b</sup>: significant difference between phase 3 and phase 4



**TABLE S7** Raw data quality control information

| Sample | InsertSize (bp) | SeqStrategy | RawData (Mbp) | CleanData (Mbp) | Clean_Q30 (%) | Clean_GC (%) |
|--------|-----------------|-------------|---------------|-----------------|---------------|--------------|
| A1     | 350             | (150 : 150) | 21,409.67     | 21,402.37       | 93.29         | 43.83        |
| A2     | 350             | (150 : 150) | 21,380.62     | 21,374.82       | 93.54         | 45.05        |

**TABLE S8** Metagenome assembly information

| Statistical level   | Original           |                    |                    | Scaffold > 500bp   |                    |                    |
|---------------------|--------------------|--------------------|--------------------|--------------------|--------------------|--------------------|
|                     | scaffold           | contig             | contig > (500)     | scaffold           | contig             | contig > (500)     |
| Total number (>)    | 69620 ± 4268       | 69620 ± 4268       | 69620 ± 4268       | 69620 ± 4268       | 69620 ± 4268       | 69620 ± 4268       |
| Total length (bp)   | 148213513 ± 511039 | 148213513 ± 511039 | 148213513 ± 511039 | 148213513 ± 511039 | 148213513 ± 511039 | 148213513 ± 511039 |
| Gap number (bp)     | 0                  | 0                  | 0                  | 0                  | 0                  | 0                  |
| Average length (bp) | 2137.93 ± 138.44   | 2137.93 ± 138.44   | 2137.93 ± 138.44   | 2137.93 ± 138.44   | 2137.93 ± 138.44   | 2137.93 ± 138.44   |
| N50 Length (bp)     | 4253 ± 700         | 4253 ± 700         | 4253 ± 700         | 4253 ± 700         | 4253 ± 700         | 4253 ± 700         |
| N90 Length (bp)     | 740.5 ± 14.5       | 740.5 ± 14.5       | 740.5 ± 14.5       | 740.5 ± 14.5       | 740.5 ± 14.5       | 740.5 ± 14.5       |
| Maximum length (bp) | 864770 ± 219749    | 864770 ± 219749    | 864770 ± 219749    | 864770 ± 219749    | 864770 ± 219749    | 864770 ± 219749    |
| Minimum length (bp) | 500 ± 0.00         | 500 ± 0.00         | 500 ± 0.00         | 500 ± 0.00         | 500 ± 0.00         | 500 ± 0.00         |
| GC content (%)      | 45.65 ± 0.15       | 45.65 ± 0.15       | 45.65 ± 0.15       | 45.65 ± 0.15       | 45.65 ± 0.15       | 45.65 ± 0.15       |

**TABLE S9** Gene catalogue information

|                  |                   |
|------------------|-------------------|
| ORFs NO.         | 182170 ± 400      |
| integrity: end   | 31125 ± 1646      |
| integrity: start | 38336 ± 1581      |
| integrity: all   | 102210.5 ± 3612.5 |
| integrity: none  | 10498.5 ± 785.5   |
| Total Len (Mbp)  | 131.255 ± 0.095   |
| Average Len (bp) | 720.51 ± 1.05     |
| GC percent       | 45.845 ± 0.415    |

ORFs NO. means the numbers of genes in gene catalogue, integrity: end means the number of genes that contain only termination codons, integrity: start means the number of genes that contain only initial codons, integrity: all means the number of complete genes, integrity: none means the number of genes that have neither termination codon nor initial codon.

**TABLE S10** The abundance of gene annotated to species at all levels information

|                             |       |
|-----------------------------|-------|
| Annotated on Unclassified:  | 4.78% |
| Annotated on Kingdom level: | 95.2% |
| Annotated on Phylum level:  | 92.9% |
| Annotated on Class level:   | 85.1% |
| Annotated on Order level:   | 71.1% |
| Annotated on Family level:  | 55.9% |
| Annotated on Genus level:   | 54.1% |
| Annotated on Species level: | 55.1% |

**TABLE S11** Relative abundance of functional genes at the metabolic level3

| Metabolic pathway                                                          | Sequence assign (%) |
|----------------------------------------------------------------------------|---------------------|
| Environmental Information Processing; Membrane transport; ABC transporters | 4.7532 ± 0.2779     |
| Genetic Information Processing; Translation; Ribosome                      | 4.0897 ± 0.1952     |
| Metabolism; Nucleotide metabolism; Purine metabolism                       | 3.667 ± 0.054       |
| Metabolism; Nucleotide metabolism; Pyrimidine metabolism                   | 3.1975 ± 0.0773     |
| Cellular Processes; Cellular community - prokaryotes; Quorum               | 2.4621 ± 0.0323     |

|                                                                                        |                   |
|----------------------------------------------------------------------------------------|-------------------|
| sensing                                                                                |                   |
| Metabolism; Carbohydrate metabolism; Pyruvate metabolism                               | 2.2288 ± 0.0241   |
| Metabolism; Carbohydrate metabolism; Glycolysis / Gluconeogenesis                      | 2.1734 ± 0.0212   |
| Metabolism; Carbohydrate metabolism; Amino sugar and nucleotide sugar metabolism       | 2.1369 ± 0.0161   |
| Environmental Information Processing; Signal transduction; Two-component system        | 1.9239 ± 5.44E-03 |
| Genetic Information Processing; Translation; Aminoacyl-tRNA biosynthesis               | 1.8798 ± 0.0641   |
| Metabolism; Energy metabolism; Carbon fixation pathways in prokaryotes                 | 1.8233 ± 0.0797   |
| Metabolism; Amino acid metabolism; Cysteine and methionine metabolism                  | 1.8175 ± 0.0548   |
| Metabolism; Amino acid metabolism; Alanine, aspartate and glutamate metabolism         | 1.6921 ± 0.0338   |
| Metabolism; Energy metabolism; Oxidative phosphorylation                               | 1.6614 ± 0.1605   |
| Genetic Information Processing; Replication and repair; Homologous recombination       | 1.6463 ± 0.0335   |
| Metabolism; Amino acid metabolism; Glycine, serine and threonine metabolism            | 1.6461 ± 0.0288   |
| Metabolism; Carbohydrate metabolism; Starch and sucrose metabolism                     | 1.5844 ± 0.05     |
| Metabolism; Carbohydrate metabolism; Citrate cycle (TCA cycle)                         | 1.5258 ± 0.1484   |
| Metabolism; Carbohydrate metabolism; Pentose phosphate pathway                         | 1.4561 ± 0.0285   |
| Genetic Information Processing; Replication and repair; Mismatch repair                | 1.3871 ± 0.0336   |
| Metabolism; Energy metabolism; Methane metabolism                                      | 1.3767 ± 0.0747   |
| Metabolism; Carbohydrate metabolism; Glyoxylate and dicarboxylate metabolism           | 1.33 ± 0.0172     |
| Metabolism; Carbohydrate metabolism; Propanoate metabolism                             | 1.3214 ± 0.0313   |
| Metabolism; Glycan biosynthesis and metabolism; Peptidoglycan biosynthesis             | 1.3206 ± 0.0338   |
| Metabolism; Carbohydrate metabolism; Fructose and mannose metabolism                   | 1.2007 ± 0.0103   |
| Metabolism; Carbohydrate metabolism; Butanoate metabolism                              | 1.1819 ± 0.0365   |
| Genetic Information Processing; Replication and repair; DNA replication                | 1.1535 ± 7.21E-03 |
| Metabolism; Energy metabolism; Carbon fixation in photosynthetic organisms             | 1.0546 ± 0.0113   |
| Metabolism; Amino acid metabolism; Phenylalanine, tyrosine and tryptophan biosynthesis | 1.053 ± 0.0355    |
| Genetic Information Processing; Folding, sorting and degradation;                      | 1.0184 ± 0.0183   |

|                                                                                           |                   |
|-------------------------------------------------------------------------------------------|-------------------|
| RNA degradation                                                                           |                   |
| Metabolism; Amino acid metabolism; Lysine biosynthesis                                    | 1.0116 ± 0.0323   |
| Metabolism; Carbohydrate metabolism; Galactose metabolism                                 | 0.9926 ± 0.0496   |
| Metabolism; Amino acid metabolism; Arginine biosynthesis                                  | 0.9788 ± 0.0143   |
| Genetic Information Processing; Folding, sorting and degradation; Protein export          | 0.9056 ± 1.92E-03 |
| Metabolism; Lipid metabolism; Glycerophospholipid metabolism                              | 0.883 ± 0.0182    |
| Metabolism; Metabolism of cofactors and vitamins; Porphyrin and chlorophyll metabolism    | 0.8828 ± 0.0168   |
| Genetic Information Processing; Replication and repair; Nucleotide excision repair        | 0.8638 ± 0.0498   |
| Metabolism; Lipid metabolism; Fatty acid biosynthesis                                     | 0.8346 ± 0.0614   |
| Metabolism; Metabolism of cofactors and vitamins; Thiamine metabolism                     | 0.8207 ± 0.0849   |
| Metabolism; Metabolism of cofactors and vitamins; Pantothenate and CoA biosynthesis       | 0.8172 ± 0.0234   |
| Environmental Information Processing; Membrane transport; Bacterial secretion system      | 0.7929 ± 3.63E-03 |
| Cellular Processes; Cell growth and death; Cell cycle - Caulobacter                       | 0.7904 ± 9.08E-03 |
| Metabolism; Metabolism of cofactors and vitamins; Nicotinate and nicotinamide metabolism  | 0.7832 ± 0.0828   |
| Metabolism; Metabolism of cofactors and vitamins; One carbon pool by folate               | 0.7336 ± 0.0379   |
| Metabolism; Metabolism of terpenoids and polyketides; Terpenoid backbone biosynthesis     | 0.6989 ± 0.0244   |
| Metabolism; Metabolism of other amino acids; Selenocompound metabolism                    | 0.6944 ± 0.0766   |
| Genetic Information Processing; Replication and repair; Base excision repair              | 0.6651 ± 0.022    |
| Metabolism; Carbohydrate metabolism; Pentose and glucuronate interconversions             | 0.6644 ± 0.0138   |
| Metabolism; Amino acid metabolism; Arginine and proline metabolism                        | 0.6554 ± 0.0348   |
| Metabolism; Metabolism of cofactors and vitamins; Folate biosynthesis                     | 0.6447 ± 0.0945   |
| Environmental Information Processing; Membrane transport; Phosphotransferase system (PTS) | 0.6391 ± 0.1671   |
| Human Diseases; Drug resistance: Antimicrobial; beta-Lactam resistance                    | 0.6384 ± 7.15E-03 |
| Metabolism; Energy metabolism; Nitrogen metabolism                                        | 0.6359 ± 0.058    |
| Cellular Processes; Cell motility; Flagellar assembly                                     | 0.5963 ± 0.0754   |
| Metabolism; Amino acid metabolism; Histidine metabolism                                   | 0.5739 ± 2.49E-03 |
| Metabolism; Xenobiotics biodegradation and metabolism; Drug metabolism - other enzymes    | 0.5596 ± 3.31E-03 |

|                                                                                |                   |
|--------------------------------------------------------------------------------|-------------------|
| Metabolism; Amino acid metabolism; Valine, leucine and isoleucine degradation  | 0.5118 ± 0.0293   |
| Metabolism; Amino acid metabolism; Valine, leucine and isoleucine biosynthesis | 0.509 ± 0.0534    |
| Metabolism; Lipid metabolism; Glycerolipid metabolism                          | 0.5074 ± 0.0386   |
| Cellular Processes; Cell motility; Bacterial chemotaxis                        | 0.5007 ± 1.91E-03 |

**TABLE S12** The detailed genomic characteristics of all the bins

| Bin | Completeness (%) | Contamination (%) | GC (%) | Lineage            | N50 (bp) | Size (bp) |
|-----|------------------|-------------------|--------|--------------------|----------|-----------|
| A1  |                  |                   |        |                    |          |           |
| 1   | 94.11            | 2.797             | 30.6%  | o__Clostridiales   | 15678    | 2303007   |
| 9   | 76.01            | 1.785             | 47.6%  | k__Bacteria        | 33937    | 1515065   |
| 10  | 79.95            | 3.705             | 65.2%  | k__Actinobacteria  | 4680     | 2107664   |
| 11  | 95.70            | 0.0               | 51.6%  | p__Euryarchaeota   | 56651    | 1141960   |
| 12  | 100.0            | 0.0               | 69.0%  | o__Actinomycetales | 66535    | 3333348   |
| 13  | 78.92            | 3.605             | 35.5%  | o__Clostridiales   | 3745     | 1933843   |
| 14  | 89.81            | 0.125             | 33.8%  | p__Bacteroidales   | 34176    | 2457727   |
| 17  | 93.71            | 0.0               | 46.0%  | o__Clostridiales   | 87273    | 5683546   |
| 19  | 77.55            | 1.037             | 37.1%  | p__Bacteroidales   | 3934     | 1563338   |
| 20  | 86.31            | 0.0               | 48.3%  | o__Clostridiales   | 11703    | 3780825   |
| 22  | 89.71            | 3.021             | 35.2%  | o__Clostridiales   | 43479    | 2329384   |
| 23  | 76.56            | 1.582             | 62.2%  | o__Actinomycetales | 4920     | 2160114   |
| 26  | 90.64            | 0.894             | 40.7%  | o__Clostridiales   | 10758    | 1712818   |
| 28  | 84.56            | 2.439             | 34.8%  | o__Clostridiales   | 11421    | 1713900   |
| 29  | 88.72            | 0.0               | 43.3%  | k__Bacteria        | 14169    | 2673769   |
| 30  | 82.15            | 1.901             | 61.2%  | o__Clostridiales   | 34491    | 1717832   |
| 31  | 98.73            | 2.887             | 42.5%  | o__Clostridiales   | 48880    | 4068098   |
| 32  | 81.87            | 3.131             | 44.3%  | o__Clostridiales   | 8486     | 1704623   |
| 34  | 87.83            | 1.308             | 38.8%  | o__Lactobacillales | 7779     | 1694662   |
| 36  | 92.42            | 0.0               | 39.0%  | o__Clostridiales   | 33257    | 2777365   |
| 38  | 96.87            | 1.206             | 36.1%  | c__Bacilli         | 25203    | 2676825   |
| 39  | 85.22            | 2.016             | 36.1%  | c__Clostridia      | 5710     | 1760298   |
| 40  | 87.27            | 0.503             | 33.6%  | o__Clostridiales   | 9603     | 2527697   |
| 43  | 98.8             | 0.8               | 38.3%  | p__Euryarchaeota   | 27127    | 2054514   |
| 44  | 81.31            | 1.364             | 43.4%  | f__Lachnospiraceae | 7324     | 2241762   |
| 45  | 91.41            | 0.632             | 45.6%  | o__Clostridiales   | 9039     | 4034241   |
| 46  | 97.68            | 1.348             | 71.5%  | o__Actinomycetales | 18560    | 1922448   |
| 47  | 78.48            | 0.0               | 53.9%  | o__Clostridiales   | 82503    | 2040129   |
| A2  |                  |                   |        |                    |          |           |
| 11  | 71.55            | 2.586             | 34.8%  | k__Bacteria        | 4401     | 3340318   |
| 12  | 92.82            | 0.0               | 43.7%  | o__Clostridiales   | 59094    | 2268218   |
| 14  | 97.97            | 0.0               | 71.6%  | o__Actinomycetales | 85266    | 1926238   |

|    |       |       |       |                    |        |         |
|----|-------|-------|-------|--------------------|--------|---------|
| 15 | 91.33 | 1.699 | 35.8% | c__Bacilli         | 21261  | 2627343 |
| 16 | 74.36 | 1.582 | 43.5% | o__Clostridiales   | 16772  | 2026195 |
| 17 | 97.14 | 0.317 | 50.2% | k__Bacteria        | 42964  | 2315694 |
| 18 | 80.54 | 0.0   | 43.3% | k__Bacteria        | 9065   | 2515969 |
| 22 | 80.73 | 1.420 | 33.6% | c__Clostridia      | 6910   | 1792635 |
| 23 | 82.73 | 0.0   | 51.4% | o__Clostridiales   | 13281  | 4232469 |
| 26 | 98.46 | 1.666 | 48.0% | p__Firmicutes      | 171709 | 2449457 |
| 29 | 80.28 | 1.273 | 46.5% | o__Clostridiales   | 7008   | 3927156 |
| 33 | 96.22 | 1.388 | 67.0% | o__Actinomycetales | 28756  | 2978660 |
| 40 | 81.90 | 3.191 | 31.2% | o__Clostridiales   | 4800   | 1866415 |
| 43 | 70.45 | 1.724 | 61.9% | k__Bacteria        | 6110   | 1528936 |
| 45 | 89.13 | 1.308 | 39.4% | o__Lactobacillales | 7064   | 2060655 |

**TABLE S13** More information about enzymes in MCCA-production

| Metabolic pathway               | Abbreviation | Gene        | Definition                                                | KO_ID  | EC No.    |
|---------------------------------|--------------|-------------|-----------------------------------------------------------|--------|-----------|
| Lactate oxidation               | LDH          | <i>ldh</i>  | lactate dehydrogenase                                     | K00016 | 1.1.1.27  |
|                                 | PFOR         | <i>por</i>  | Pyruvate ferredoxin oxidoreductase                        | K03737 | 1.2.7.1   |
| Fatty acid biosynthesis pathway | ACC          | <i>accA</i> | acetyl-CoA carboxylase carboxyl transferase subunit alpha | K01962 | 6.4.1.2   |
|                                 |              | <i>accB</i> | acetyl-CoA carboxylase biotin carboxyl carrier protein    | K02160 | -         |
|                                 |              | <i>accC</i> | acetyl-CoA carboxylase, biotin carboxylase subunit        | K01961 | 6.4.1.2   |
|                                 |              | <i>accD</i> | acetyl-CoA carboxylase carboxyl transferase subunit beta  | K01963 | 6.4.1.2   |
|                                 | MAT          | <i>fas</i>  | fatty acid synthase                                       | K11533 | 2.3.1.-   |
|                                 |              | <i>fabD</i> | [acyl-carrier-protein] S-malonyltransferase               | K00645 | 2.3.1.39  |
|                                 | KAS          | <i>fas</i>  | fatty acid synthase                                       | K11533 | 2.3.1.-   |
|                                 |              | <i>fabB</i> | 3-oxoacyl-[acyl-carrier-protein] synthase I               | K00647 | 2.3.1.41  |
|                                 |              | <i>fabF</i> | 3-oxoacyl-[acyl-carrier-protein] synthase II              | K09458 | 2.3.1.179 |
|                                 |              | <i>fabH</i> | 3-oxoacyl-[acyl-carrier-protein] synthase III             | K00648 | 2.3.1.180 |

|      |                                    |                      |                                                  |                                |                     |          |
|------|------------------------------------|----------------------|--------------------------------------------------|--------------------------------|---------------------|----------|
|      | KAR                                | <i>fas</i>           | fatty acid synthase                              | K11533                         | 2.3.1.-             |          |
|      |                                    | <i>fabG</i>          | 3-oxoacyl-[acyl-carrier protein] reductase       | K00059                         | 1.1.1.100           |          |
|      | HAD                                | <i>fas</i>           | fatty acid synthase                              | K11533                         | 2.3.1.-             |          |
|      |                                    | <i>fabZ</i>          | 3-hydroxyacyl-[acyl-carrier-protein] dehydratase | K02372                         | 4.2.1.59            |          |
|      | EAR                                | <i>fas</i>           | fatty acid synthase                              | K11533                         | 2.3.1.-             |          |
|      |                                    | <i>fabI</i>          | enoyl-[acyl-carrier protein] reductase I         | K00208                         | 1.3.1.9<br>1.3.1.10 |          |
|      |                                    | <i>fabK</i>          | enoyl-[acyl-carrier protein] reductase II        | K02371                         | 1.3.1.9             |          |
|      |                                    | <i>fabL</i>          | enoyl-[acyl-carrier protein] reductase III       | K10780                         | 1.3.1.104           |          |
|      | ACT                                | <i>paaI</i>          | acyl-CoA thioesterase                            | K02614                         | 3.1.2.-             |          |
|      | Reverse $\beta$ -oxidation pathway | ACAT                 | <i>fadA</i>                                      | acetyl-CoA acyltransferase     | K00632              | 2.3.1.16 |
|      |                                    |                      | <i>atoB</i>                                      | acetyl-CoA C-acetyltransferase | K00626              | 2.3.1.9  |
| HCD  |                                    | <i>paaH/hbd/fadB</i> | 3-hydroxybutyryl-CoA dehydrogenase               | K00074                         | 1.1.1.157           |          |
|      |                                    | <i>fadJ</i>          |                                                  | K01782                         | 1.1.1.35            |          |
|      |                                    | <i>fadN</i>          |                                                  | K07516                         | 1.1.1.35            |          |
| ECH  |                                    | <i>crt</i>           | enoyl-CoA hydratase                              | K01715                         | 4.2.1.17            |          |
|      |                                    | <i>echA/paaF</i>     |                                                  | K01692                         | 4.2.1.17            |          |
| ACD  |                                    | <i>mmgC</i>          | acyl-CoA dehydrogenase                           | K18244                         | 1.3.99.-            |          |
|      |                                    | <i>acd</i>           | acyl-CoA dehydrogenase                           | K00249                         | 1.3.8.7             |          |
| EtfA |                                    | <i>etfA</i>          | electron transfer flavoprotein alpha subunit     | K03522                         | -                   |          |
| EtfB |                                    | <i>etfB</i>          | electron transfer flavoprotein beta subunit      | K03521                         | -                   |          |
| CoAT |                                    | <i>cat2</i>          | 4-hydroxybutyrate CoA-transferase                | K18122                         | 2.8.3.-             |          |
| PTA  |                                    | <i>pta</i>           | phosphate acetyltransferase                      | K00625                         | 2.3.1.8             |          |
| ACK  | <i>ackA</i>                        | acetate kinase       | K00925                                           | 2.7.2.1                        |                     |          |

|                                              |             |             |                                                                  |                  |                    |
|----------------------------------------------|-------------|-------------|------------------------------------------------------------------|------------------|--------------------|
| Energy conservation                          | RNF Complex | <i>RnfA</i> | electron transport complex protein RnfA                          | K03617           | 7.2.1.2            |
|                                              |             | <i>RnfB</i> | electron transport complex protein RnfB                          | K03616           | 7.2.1.2            |
|                                              |             | <i>RnfC</i> | electron transport complex protein RnfC                          | K03615           | 7.1.1.-            |
|                                              |             | <i>RnfD</i> | electron transport complex protein RnfD                          | K03614           | 7.2.1.2            |
|                                              |             | <i>RnfE</i> | electron transport complex protein RnfE                          | K03613           | 7.2.1.2            |
|                                              |             | <i>RnfG</i> | electron transport complex protein RnfG                          | K03612           | 7.2.1.2            |
| Wood-Werkman cycle                           | MDH         | <i>mdh</i>  | malate dehydrogenase                                             | K00024           | 1.1.1.37           |
|                                              | FUM         | <i>fum</i>  | fumarate hydratase                                               | K01679           | 4.2.1.2            |
|                                              | SDH         | <i>sdh</i>  | succinate dehydrogenase                                          | K00239<br>K00240 | 1.3.5.1<br>1.3.5.4 |
|                                              | MUT         | <i>mut</i>  | methylmalonyl-CoA mutase                                         | K01847           | 5.4.99.2           |
| Hydrogeno-trophic Methane production pathway | FWD         | <i>fwdA</i> | formylmethanofuran dehydrogenase subunit A                       | K00200           | 1.2.7.12           |
|                                              |             | <i>fwdB</i> | formylmethanofuran dehydrogenase subunit B                       | K00201           | 1.2.7.12           |
|                                              |             | <i>fwdC</i> | formylmethanofuran dehydrogenase subunit C                       | K00202           | 1.2.7.12           |
|                                              |             | <i>fwdD</i> | formylmethanofuran dehydrogenase subunit D                       | K00203           | 1.2.7.12           |
|                                              |             | <i>fwdE</i> | formylmethanofuran dehydrogenase subunit E                       | K11261           | 1.2.7.12           |
|                                              | FTR         | <i>ptr</i>  | formylmethanofuran-- tetrahydromethanopterin N-formyltransferase | K00672           | 2.3.1.101          |
|                                              | MCH         | <i>mch</i>  | methenyltetrahydromethanopterin cyclohydrolase                   | K01499           | 3.5.4.27           |
|                                              | MTD         | <i>mtd</i>  | methylenetetrahydromethanopterin dehydrogenase                   | K00319           | 1.5.98.1           |
|                                              | MER         | <i>mer</i>  | 5,10-methylenetetrahydromethanopterin reductase                  | K00320           | 1.5.98.2           |



|                                          |     |             |                                                       |        |           |
|------------------------------------------|-----|-------------|-------------------------------------------------------|--------|-----------|
|                                          | MTR | <i>mtrA</i> | tetrahydromethanopterin S-methyltransferase subunit A | K00577 | 2.1.1.86  |
|                                          |     | <i>mtrB</i> | tetrahydromethanopterin S-methyltransferase subunit B | K00578 | 2.1.1.86  |
|                                          |     | <i>mtrC</i> | tetrahydromethanopterin S-methyltransferase subunit C | K00579 | 2.1.1.86  |
|                                          |     | <i>mtrD</i> | tetrahydromethanopterin S-methyltransferase subunit D | K00580 | 2.1.1.86  |
|                                          |     | <i>mtrE</i> | tetrahydromethanopterin S-methyltransferase subunit E | K00581 | 2.1.1.86  |
|                                          | MCR | <i>mcrA</i> | methyl-coenzyme M reductase alpha subunit             | K00399 | 2.8.4.1   |
|                                          |     | <i>mcrB</i> | methyl-coenzyme M reductase beta subunit              | K00401 | 2.8.4.1   |
|                                          |     | <i>mcrC</i> | methyl-coenzyme M reductase subunit C                 | K03421 | -         |
|                                          |     | <i>mcrD</i> | methyl-coenzyme M reductase subunit D                 | K03422 | -         |
|                                          |     | <i>mcrG</i> | methyl-coenzyme M reductase gamma subunit             | K00402 | 2.8.4.1   |
| Aceto-trophic Methane production pathway | CDH | <i>cdhD</i> | acetyl-CoA decarbonylase/synthase complex             | K00194 | 2.1.1.245 |
|                                          | MTR | <i>mtrA</i> | tetrahydromethanopterin S-methyltransferase subunit A | K00577 | 2.1.1.86  |
|                                          |     | <i>mtrB</i> | tetrahydromethanopterin S-methyltransferase subunit B | K00578 | 2.1.1.86  |
|                                          |     | <i>mtrC</i> | tetrahydromethanopterin S-methyltransferase subunit C | K00579 | 2.1.1.86  |
|                                          |     | <i>mtrD</i> | tetrahydromethanopterin S-methyltransferase subunit D | K00580 | 2.1.1.86  |
|                                          |     | <i>mtrE</i> | tetrahydromethanopterin S-methyltransferase subunit E | K00581 | 2.1.1.86  |
|                                          | MCR | <i>mcrA</i> | methyl-coenzyme M reductase alpha subunit             | K00399 | 2.8.4.1   |
|                                          |     | <i>mcrB</i> | methyl-coenzyme M reductase beta subunit              | K00401 | 2.8.4.1   |
|                                          |     | <i>mcrC</i> | methyl-coenzyme M reductase subunit C                 | K03421 | -         |
|                                          |     | <i>mcrD</i> | methyl-coenzyme M reductase subunit D                 | K03422 | -         |

|  |  |             |                                              |        |         |
|--|--|-------------|----------------------------------------------|--------|---------|
|  |  | <i>mcrG</i> | methyl-coenzyme M reductase<br>gamma subunit | K00402 | 2.8.4.1 |
|--|--|-------------|----------------------------------------------|--------|---------|

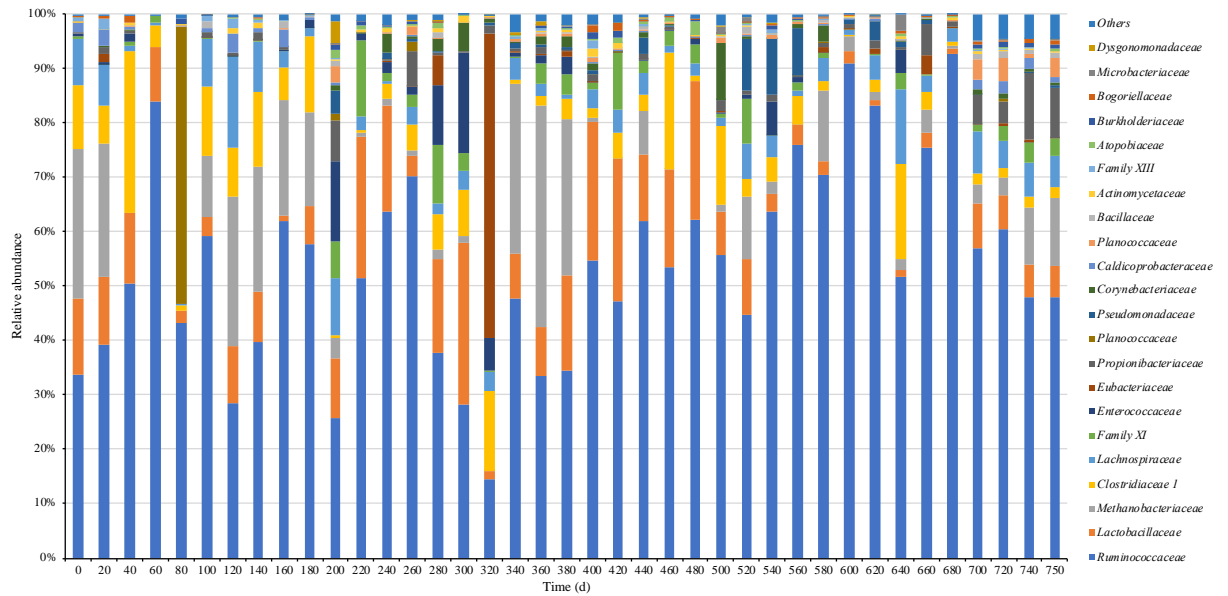

**FIG. S1** Variations of taxonomic composition of reactor microbiome at family level. Thirty-nine samples were sequenced during the 780 days. 22 bacteria families were identified with a relative abundance of greater than 0.1% in samples.

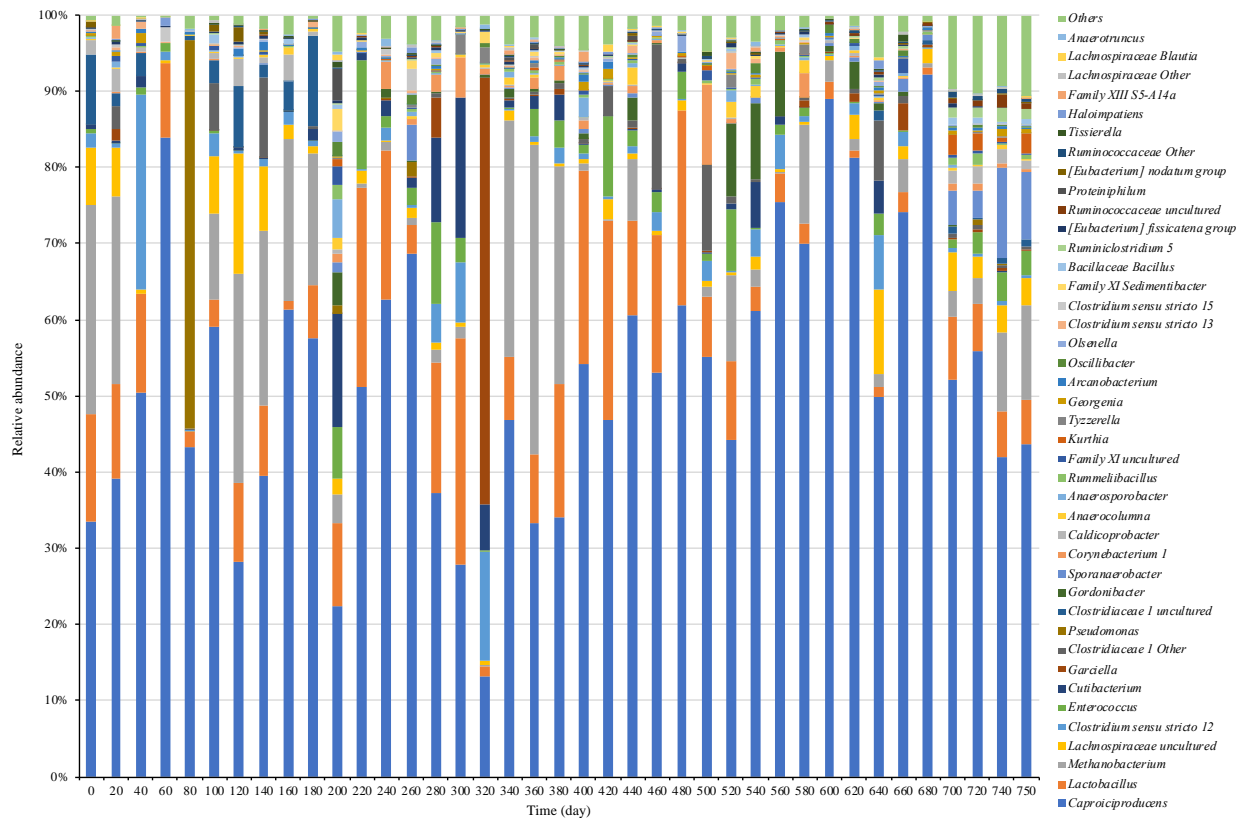

**FIG. S2** Variations of taxonomic composition of reactor microbiome at genus level. 41 bacteria genera were identified with a relative abundance of greater than 0.1% in samples.

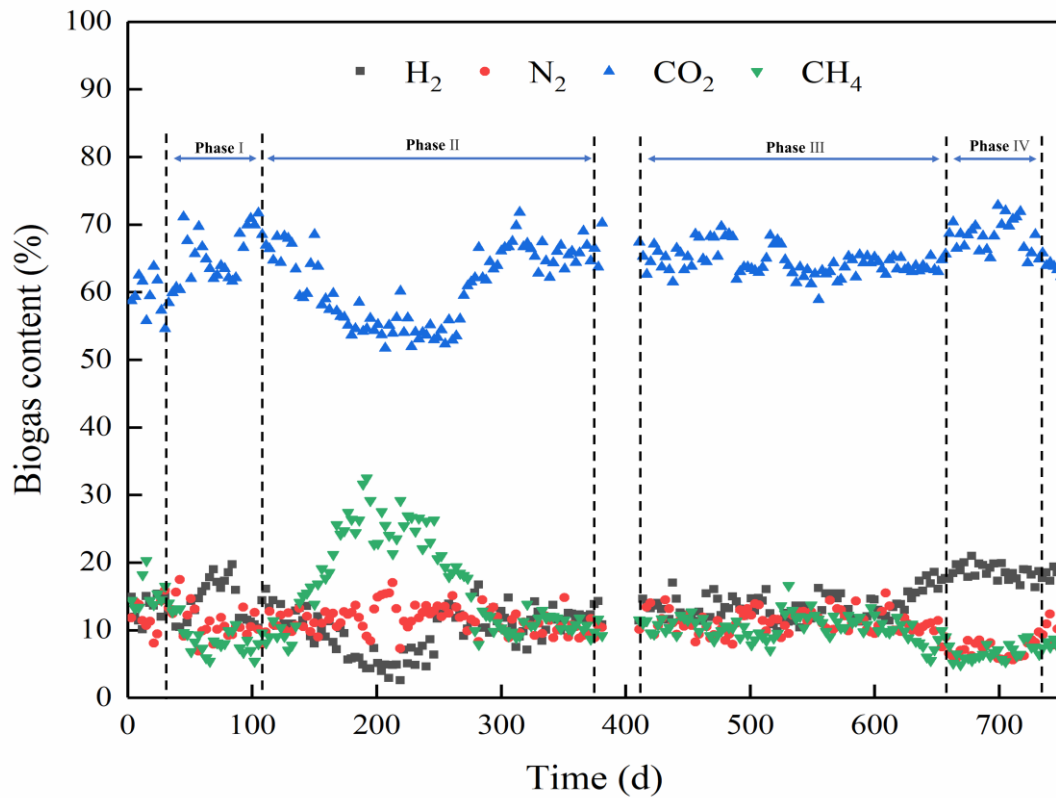

FIG. S3. Gas components of bioreactors treating with lactate artificial wastewater

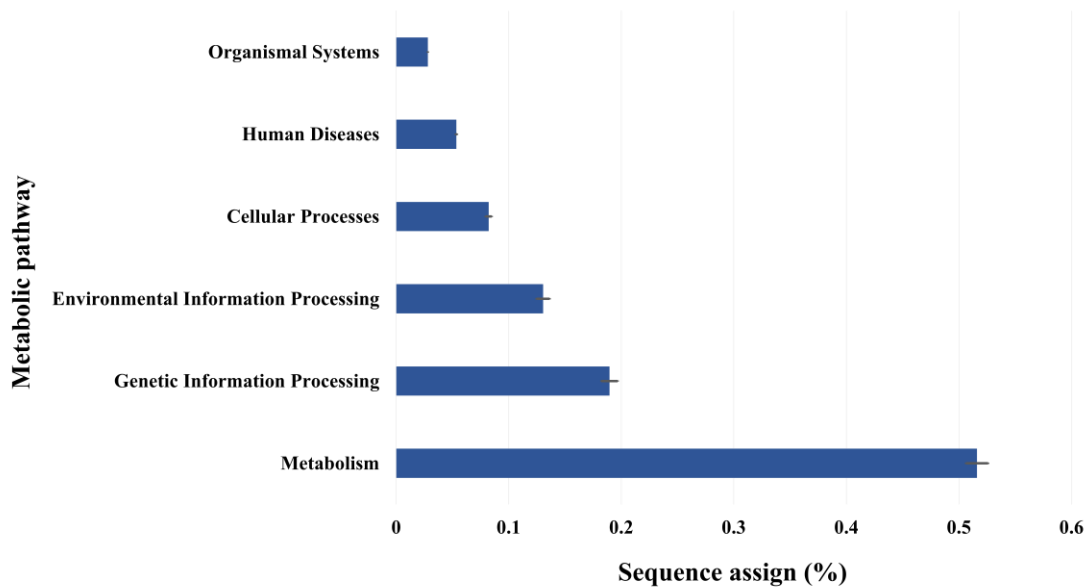

FIG. S4 Relative abundance of functional genes at the metabolic level 1

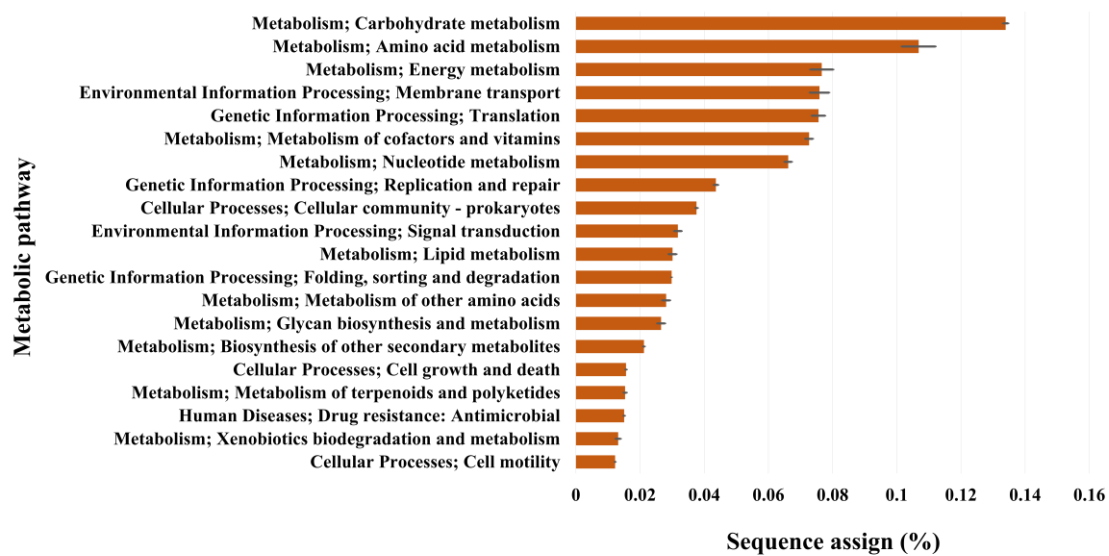

**FIG. S5** Relative abundance of functional genes at the metabolic level 2
